# Supplementary material for: Targeting neuronal lysosomal dysfunction caused by β-glucocerebrosidase deficiency with an enzyme-based Brain Shuttle construct
Source: Research Square preprint supplement (doi:10.21203/rs.3.rs-1490073/v1), 2022-04-26
Supplement: Supplementary file 1 [file 849c72d7bcfc6cfbf21d742f.xlsx]

## Sheet: Statistics(lysosome proteomic)
Metric changes for proteins in GBA KO lysosomes and GCase rescued lysosomes (corresponding to Main Fig. 4C)
Metric
	GCDH	RINT1	LEPROT	NARS2	ESRRA	AMBP	RBM15B	FMR1	TAF5L	S100A9	RANBP6	TANC2	HDDC3
H4 GBA-KO_Lysosomes / H4 GBA-WT_Lysosomes	20.35	16.39	16.24	14.09	13.13	11.4	9.46	8.75	7.39	6.68	-9.86	-20.39	-27.12
H4 GBA-KO_GCase_Lysosome / H4 GBA-KO_Lysosomes	-28.55	-12.77	-13.05	-12.73	-12.23	-6.7	-12.36	-6.65	-8.26	-16.48	17.35	21.34	39.89
Log2FC (edgeR_Log2FC)
	GCDH	RINT1	LEPROT	NARS2	ESRRA	AMBP	RBM15B	FMR1	TAF5L	S100A9	RANBP6	TANC2	HDDC3
H4 GBA-KO_Lysosomes / H4 GBA-WT_Lysosomes	2.19302	4.77238	4.72398	3.56722	3.26559	3.69184	2.46803	3.26878	2.87663	1.76943	-1.78402	-5.77043	-2.02339
H4 GBA-KO_GCase_Lysosome / H4 GBA-KO_Lysosomes	-2.48613	-4.28894	-4.3025	-3.42285	-3.17351	-2.96383	-2.74019	-2.91968	-3.01001	-2.49161	2.20156	5.8886	2.32887
FDR value (edgeR_FDR)
	GCDH	RINT1	LEPROT	NARS2	ESRRA	AMBP	RBM15B	FMR1	TAF5L	S100A9	RANBP6	TANC2	HDDC3
H4 GBA-KO_Lysosomes / H4 GBA-WT_Lysosomes	3.82057e-07	0.0289761	0.0289761	0.0144551	0.0127324	0.04421	0.0169837	0.0782493	0.0934937	0.0181475	0.000980085	0.0274314	5.21566e-11
H4 GBA-KO_GCase_Lysosome / H4 GBA-KO_Lysosomes	2.70353e-09	0.0912218	0.08679	0.0266883	0.0213538	0.257526	0.00630483	0.251787	0.125357	0.000109593	7.84322e-06	0.0299688	1.62284e-14

## Sheet: Statistics(lysosome lipidomic)
Metric changes for lipids in GBA KO lysosomes and GCase rescued lysosomes (corresponding to Main Fig. 4D)
Metric
	HexCer 36:1;2	HexCer 44:2;2	HexCer 34:1;3	HexCer 34:0;2	HexCer 34:2;2	HexCer 42:2;2	HexCer 40:1;2	HexCer 34:1;2	HexCer 34:2;3	HexCer 40:2;2	HexCer 38:1;2	HexCer 42:1;2	PG 17:0;0_18:2;0	PG 16:1;0_19:1;0	PC O-18:1;0/19:1;0	PG 16:1;0_18:2;0	PG 20:4;0_20:4;0
H4 GBA-KO_Lysosomes / H4 GBA-WT_Lysosomes	10.57	9.74	9.28	9.24	8.32	7.52	7.37	7.24	7.06	6.59	5.16	4.39	3.45	3.43	1.76	-6.32	-8.86
H4 GBA-KO_GCase_Lysosome / H4 GBA-KO_Lysosomes	-5.79	-3.42	-2.94	-4.82	-2.45	-3.93	-3.21	-3.35	-1.99	-3.39	-2.83	-1.84	-3.97	-3.23	-1.16	1.26	1.63
Log2FC (edgeR_Log2FC)
	HexCer 36:1;2	HexCer 44:2;2	HexCer 34:1;3	HexCer 34:0;2	HexCer 34:2;2	HexCer 42:2;2	HexCer 40:1;2	HexCer 34:1;2	HexCer 34:2;3	HexCer 40:2;2	HexCer 38:1;2	HexCer 42:1;2	PG 17:0;0_18:2;0	PG 16:1;0_19:1;0	PC O-18:1;0/19:1;0	PG 16:1;0_18:2;0	PG 20:4;0_20:4;0
H4 GBA-KO_Lysosomes / H4 GBA-WT_Lysosomes	3.57289	1.88753	1.85599	2.41684	2.38957	1.65076	1.8953	2.70266	1.62761	1.72247	1.91073	1.68706	2.67129	2.97085	1.37851	-1.91594	-4.52284
H4 GBA-KO_GCase_Lysosome / H4 GBA-KO_Lysosomes	-1.63039	-1.09234	-0.943416	-1.27928	-0.883635	-0.982791	-0.99137	-1.32916	-0.62371	-1.12343	-1.09542	-0.902389	-3.01159	-2.82623	-1.0619	1.91073	5.42626
FDR value (edgeR_FDR)
	HexCer 36:1;2	HexCer 44:2;2	HexCer 34:1;3	HexCer 34:0;2	HexCer 34:2;2	HexCer 42:2;2	HexCer 40:1;2	HexCer 34:1;2	HexCer 34:2;3	HexCer 40:2;2	HexCer 38:1;2	HexCer 42:1;2	PG 17:0;0_18:2;0	PG 16:1;0_19:1;0	PC O-18:1;0/19:1;0	PG 16:1;0_18:2;0	PG 20:4;0_20:4;0
H4 GBA-KO_Lysosomes / H4 GBA-WT_Lysosomes	0.032	0.0045	0.0045	0.012	0.014	0.0061	0.012	0.035	0.0061	0.012	0.035	0.039	0.16	0.19	0.17	0.019	0.082
H4 GBA-KO_GCase_Lysosome / H4 GBA-KO_Lysosomes	0.067	0.092	0.092	0.067	0.16	0.067	0.092	0.2	0.092	0.1	0.2	0.46	0.97	0.97	0.97	0.97	0.97

## Sheet: Statistics(wholecell proteomic)
Metric changes for proteins in GBA KO whole cells and GCase rescued whole cells (corresponding to Supplementary Fig. 5A)
Metric
	GABRB2	LRP6	TIMM10B	FAM122B	FRRS1	C2orf73	IGHG2	NCOA3	MSRB3	ACTG1	SNX33	CEP85	STK4	MON1B	ACPP	CLK2	SPPL2A	BMPR2	PARL	ALYREF	KY	CD302	ZIC2	SVIP	PISD	ACAD10	MTERF1	SGPP2	CCDC127	REEP6	KRT39	INSR	SMPDL3A	AFG1L	RBP4	CDC42SE1	ABCC10	AKAP13	HSPA1L
H4 GBA-KO_whole cells / H4 GBA-whole cells	408.54	268.93	138.6	108.41	91.83	65.39	38.9	30.94	27.86	27.43	24.95	23.65	18.89	15.96	13.66	12.05	11.73	8.65	7.62	-6.05	-7.54	-7.54	-9.85	-10.56	-11.08	-11.29	-14.06	-17.27	-20.01	-20.58	-23.21	-23.89	-29.12	-32.15	-88.47	-93.26	-104.56	-167.31	-235.17
H4 GBA-KO_GCase_whole cells / H4 GBA-KO_whole cells	-385.95	-252.76	-114.55	-27.26	-42.11	-60	-29.31	-31.81	-29.31	-15.31	-22.76	-28.66	-15.05	-12.24	-8.49	-29.84	-10.85	-6.47	-9.46	13.34	6.07	6.3	11.2	15.22	12.65	8.64	14.47	16.95	17.59	9.55	20.34	33.34	36.55	34.1	72.91	58.7	116.61	14.23	160.05
Log2FC (edgeR_Log2FC)
	GABRB2	LRP6	TIMM10B	FAM122B	FRRS1	C2orf73	IGHG2	NCOA3	MSRB3	ACTG1	SNX33	CEP85	STK4	MON1B	ACPP	CLK2	SPPL2A	BMPR2	PARL	ALYREF	KY	CD302	ZIC2	SVIP	PISD	ACAD10	MTERF1	SGPP2	CCDC127	REEP6	KRT39	INSR	SMPDL3A	AFG1L	RBP4	CDC42SE1	ABCC10	AKAP13	HSPA1L
H4 GBA-KO_whole cells / H4 GBA-whole cells	8.10311	7.02748	5.67112	5.29982	4.35354	5.62348	3.87216	3.58086	2.94259	3.84926	4.66862	3.04507	2.52676	5.3875	3.11678	2.31123	2.10548	2.16536	4.07162	-1.73564	-1.63144	-1.91301	-2.04103	-1.95232	-2.35438	-2.98488	-2.41957	-9.35363	-4.48969	-3.44214	-2.63879	-3.3038	-3.12763	-3.69194	-7.63652	-5.69805	-4.86224	-5.87956	-5.70495
H4 GBA-KO_GCase_whole cells / H4 GBA-KO_whole cells	-7.90151	-6.84354	-5.24222	-3.06583	-3.21392	-5.42372	-3.46303	-3.62018	-2.99993	-3.05316	-4.49265	-3.28023	-2.31871	-4.79171	-2.58169	-3.27261	-2.04423	-1.93702	-4.47516	2.34248	1.50428	1.78586	2.14265	2.23889	2.47706	2.68456	2.4467	9.2682	4.25354	2.54598	2.51067	3.76741	3.41447	3.77878	7.01192	4.70718	5.08252	2.24243	4.87774
FDR value (edgeR_FDR)
	GABRB2	LRP6	TIMM10B	FAM122B	FRRS1	C2orf73	IGHG2	NCOA3	MSRB3	ACTG1	SNX33	CEP85	STK4	MON1B	ACPP	CLK2	SPPL2A	BMPR2	PARL	ALYREF	KY	CD302	ZIC2	SVIP	PISD	ACAD10	MTERF1	SGPP2	CCDC127	REEP6	KRT39	INSR	SMPDL3A	AFG1L	RBP4	CDC42SE1	ABCC10	AKAP13	HSPA1L
H4 GBA-KO_whole cells / H4 GBA-whole cells	1.25303e-47	8.83992e-36	3.41105e-22	2.30058e-18	5.87641e-19	8.12205e-10	2.45569e-08	4.70098e-07	8.56142e-08	1.16848e-05	0.000513088	3.11283e-06	5.76165e-06	0.0736534	0.00404252	0.000680866	0.000331408	0.0090242	0.528439	0.0253775	0.00245296	0.0099758	0.00163359	0.000463495	0.00211071	0.0135827	0.000203745	0.543488	0.00346721	0.00014401	3.63e-07	9.42713e-06	1.1897e-07	4.14057e-07	8.53981e-10	2.17135e-14	2.5687e-19	3.83177e-26	1.31191e-38
H4 GBA-KO_GCase_whole cells / H4 GBA-KO_whole cells	9.38573e-46	2.5475e-34	1.15658e-19	3.23692e-07	3.99136e-11	3.54698e-09	7.28399e-07	3.83567e-07	5.86883e-08	0.0011333	0.00102566	4.1432e-07	4.92652e-05	0.185308	0.0426359	2.1764e-07	0.000635291	0.0384499	0.439959	0.000270864	0.00919632	0.0264424	0.000733505	2.66758e-05	0.000948513	0.0470796	0.000173331	0.736663	0.00762017	0.0166776	1.5765e-06	3.44144e-07	7.63278e-09	2.5535e-07	1.45974e-08	1.48003e-10	1.06585e-20	6.58178e-05	2.52947e-30

## Sheet: Statistics(wholecell lipidomic)
Metric changes for lipids in GBA KO whole cells and GCase rescued whole cells (corresponding to Supplementary Fig. 5B)
Metric
	HexCer 34:1;2	PG 18:1;0_22:4;0	HexCer 40:1;2	HexCer 42:2;2	HexCer 42:1;2	HexCer 34:1;3	PG 18:1;0_22:5;0	PS 20:4;0_22:0;0	HexCer 44:2;2
H4 GBA-KO_whole cells / H4 GBA-whole cells	10.58	8.11	6.79	5.33	4.84	3.61	3.29	2.69	2.6
H4 GBA-KO_GCase_whole cells / H4 GBA-KO_whole cells	-5.51	-1.11	-3.95	-4.18	-3.56	-2.51	-1.41	-1.12	-3.47
Log2FC (edgeR_Log2FC)
	HexCer 34:1;2	PG 18:1;0_22:4;0	HexCer 40:1;2	HexCer 42:2;2	HexCer 42:1;2	HexCer 34:1;3	PG 18:1;0_22:5;0	PS 20:4;0_22:0;0	HexCer 44:2;2
H4 GBA-KO_whole cells / H4 GBA-whole cells	2.46467	1.76977	2.0635	1.61353	1.848	1.76553	1.11103	1.31034	1.65535
H4 GBA-KO_GCase_whole cells / H4 GBA-KO_whole cells	-1.5649	-0.436354	-1.33643	-1.23447	-1.08314	-1.13924	-0.444184	-0.720232	-1.21424
FDR value (edgeR_FDR)
	HexCer 34:1;2	PG 18:1;0_22:4;0	HexCer 40:1;2	HexCer 42:2;2	HexCer 42:1;2	HexCer 34:1;3	PG 18:1;0_22:5;0	PS 20:4;0_22:0;0	HexCer 44:2;2
H4 GBA-KO_whole cells / H4 GBA-whole cells	0.0031	0.0024	0.0071	0.007	0.016	0.032	0.011	0.032	0.062
H4 GBA-KO_GCase_whole cells / H4 GBA-KO_whole cells	0.11	0.23	0.16	0.11	0.11	0.38	0.11	0.91	0.17
